# Supplementary material for: Identification of valid reference genes for microRNA expression studies in a hepatitis B virus replicating liver cell line
Source: PubMed Central journal article supplement (PMC4724106; doi:10.1186/s13104-016-1848-2), 2016-01-22

**Color Key**

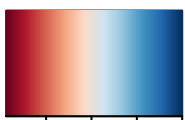

25 35

Ct Value

- HepG2-tet.48h
- HepG2-tet.72h
- DOXY.48h
- DOXY.72h

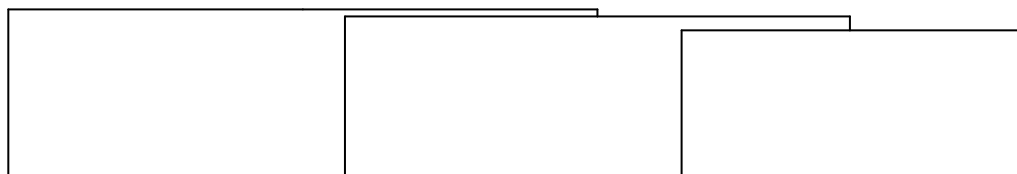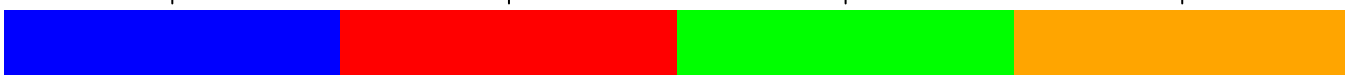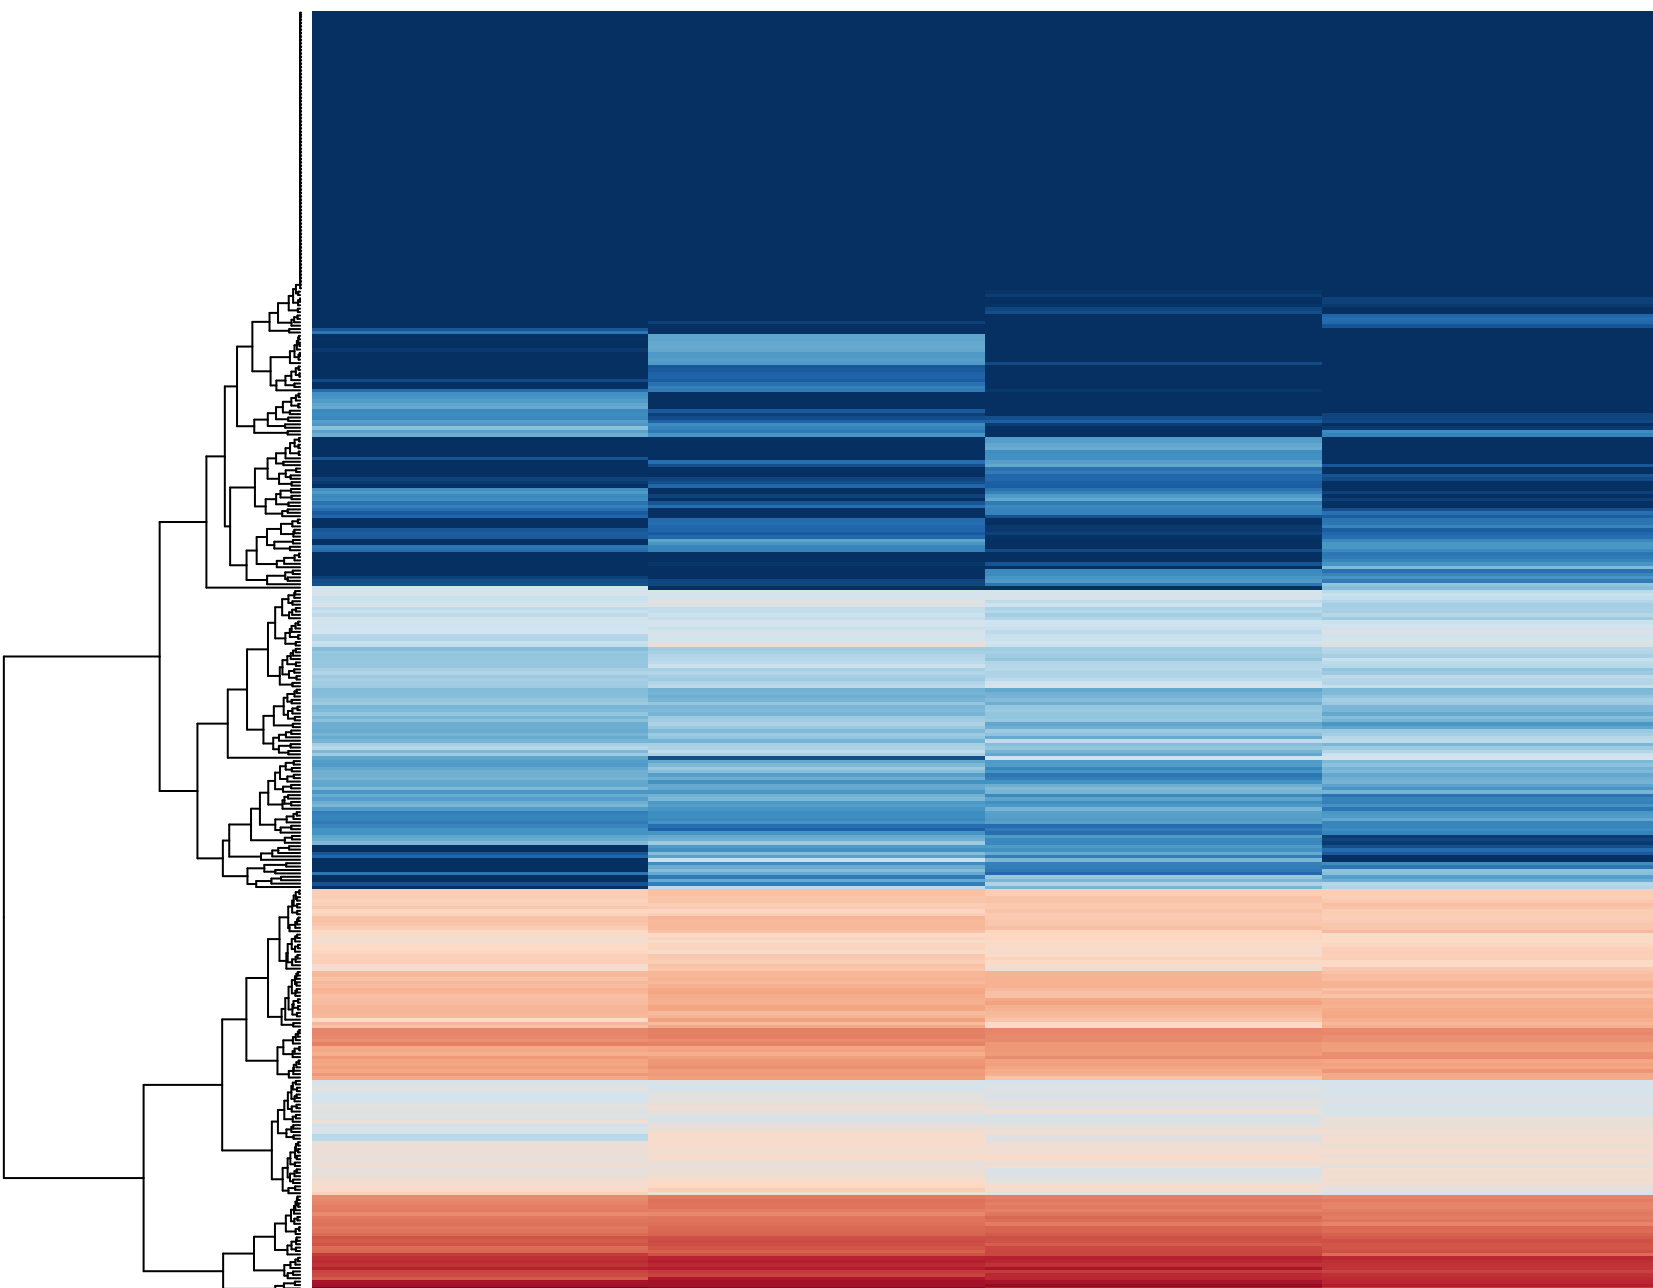

Supplement: 13104_2016_1848_MOESM1_ESM.pdf [file 13104_2016_1848_MOESM1_ESM.pdf]
